# Supplementary material
Source: ML conference proceedings conference paper supplement (https://openreview.net/forum?id=9YxBdKJx7JT)
Supplement: supplementary_material [file attachment]

# Efficient Reinforcement Learning Development with **RLzoo**

Zihan Ding<sup>1\*</sup>, Tianyang Yu<sup>2</sup>, Hongming Zhang<sup>3</sup>, Yanhua Huang<sup>4</sup>, Guo Li<sup>5</sup>,  
Quancheng Guo<sup>6</sup>, Luo Mai<sup>6</sup>, Hao Dong<sup>3</sup>

1 Princeton University 2 Nanchang University 3 Peking University 4 Xiaohongshu Technology Co.

5 Imperial College London 6 University of Edinburgh

\* speaker

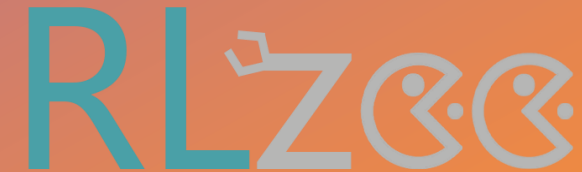

Open-source Repo: <https://github.com/tensorlayer/RLzoo>

# Recent Progress in Reinforcement Learning (RL)

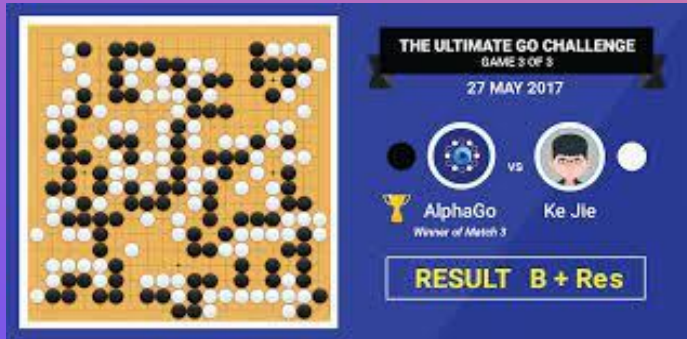

AlphaGo

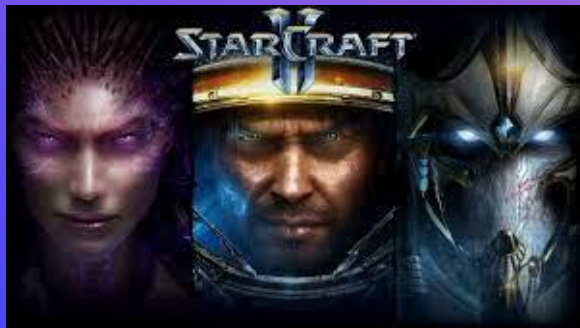

AlphaStar

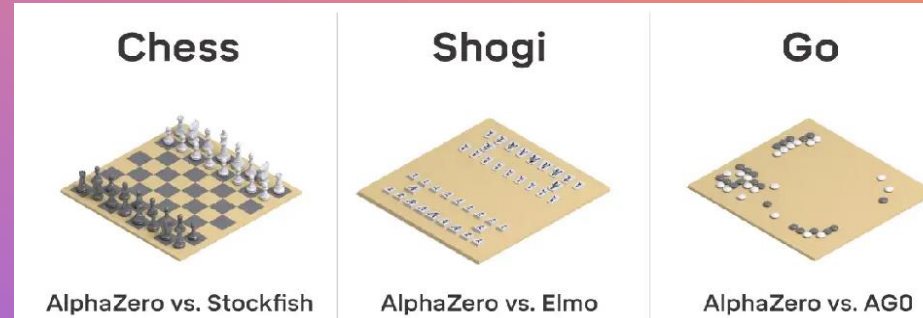

AlphaZero<sup>1</sup>

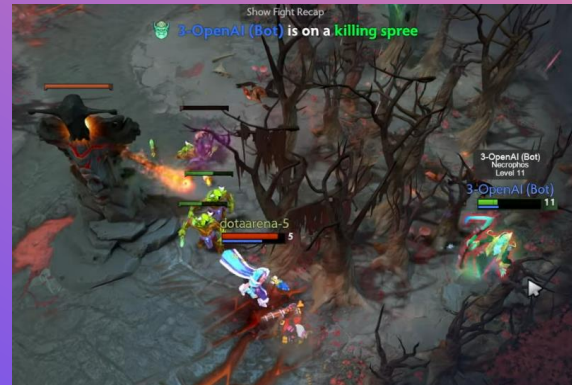

OpenAI Five: Dota<sup>2</sup>

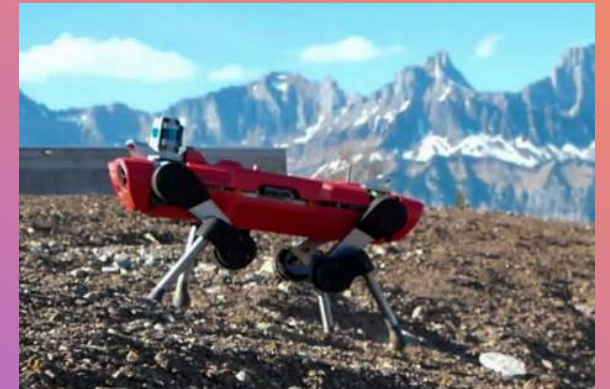

Quadrupedal Robot<sup>3</sup>

1. <https://deepmind.com/blog/article/alphazero-shedding-new-light-grand-games-chess-shogi-and-go>

2. <https://openai.com/blog/openai-five/>

3. Lee, Joonho, et al. "Learning quadrupedal locomotion over challenging terrain." *Science robotics* 5.47 (2020).

# Overview: Difficulties for a Reinforcement Learning Developer/Researcher

A typical procedure for developing with Deep Reinforcement Learning:

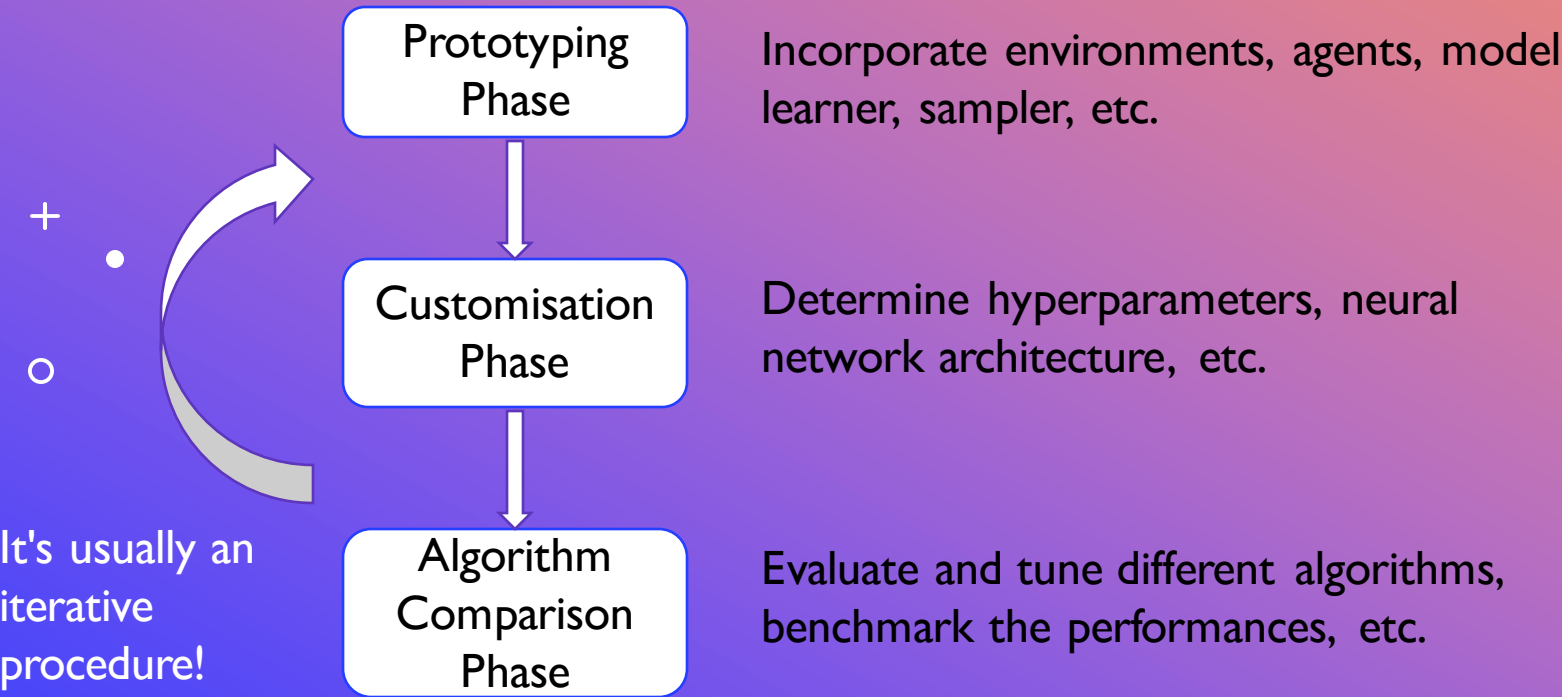

## Difficulties:

- 1. Hardness in hands-on coding for developers.
- 2. Require extensive efforts, effective evaluation framework and expert experience.
- 3. Require in-depth knowledge about DRL algorithms.

# What Are Provided in RLzoo

---

## RLzoo Characteristics:

1. High-level yet flexible APIs for declaring DRL agents

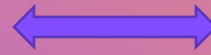

## Difficulties:

1. Hardness in hands-on coding for developers.

2. Automatic constructing process for DRL agents

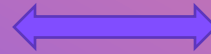

2. Require extensive efforts, effective evaluation framework and expert experience.

3. DRL model zoo

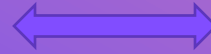

3. Require in-depth knowledge about DRL algorithms.

+

•

○

# 1. High-level yet Flexible APIs

An example launch script with RLzoo (less than 10 lines):

```
from rlzoo.common.env_wrappers import build_env
from rlzoo.common.utils import call_default_params
from rlzoo.algorithms import TD3
```

+

•

```
env_type = 'classic_control'
```

```
env_name = 'Pendulum-v0'
```

```
env = build_env ( env_name, env_type) # Build environment
```

○

```
alg_params, learn_params = call_default_params(env,env_type, 'TD3') # Create configuration
```

```
agent = TD3(**alg_params) # Construct agent
```

```
agent.learn(env, 'train', **learn_params) # Launch training
```

API table:

| Function                                                                                  | Description                                                                             |
|-------------------------------------------------------------------------------------------|-----------------------------------------------------------------------------------------|
| <code>env = <b>build_env</b>(EnvName, EnvType)</code>                                     | Return the built environment instantiation with the name and type of it.                |
| <code>alg_params, learn_params = <b>call_default_params</b>(env, EnvType, AlgName)</code> | Return two dictionaries of default hyper-parameters w.r.t. environments and algorithms. |
| <code>agent = eval(AlgName+'(**alg_params)')</code>                                       | Instantiate the class of DRL agent.                                                     |
| <code>agent.<b>learn</b>(env, mode='train', render=False, **learn_params)</code>          | Launch training/testing process with the agent.                                         |

## 2. Automatic Agent Construction

By applying three adaptor modules:

- \* observation adaptor

- \* policy adaptor

- \* action adaptor

+

•

○

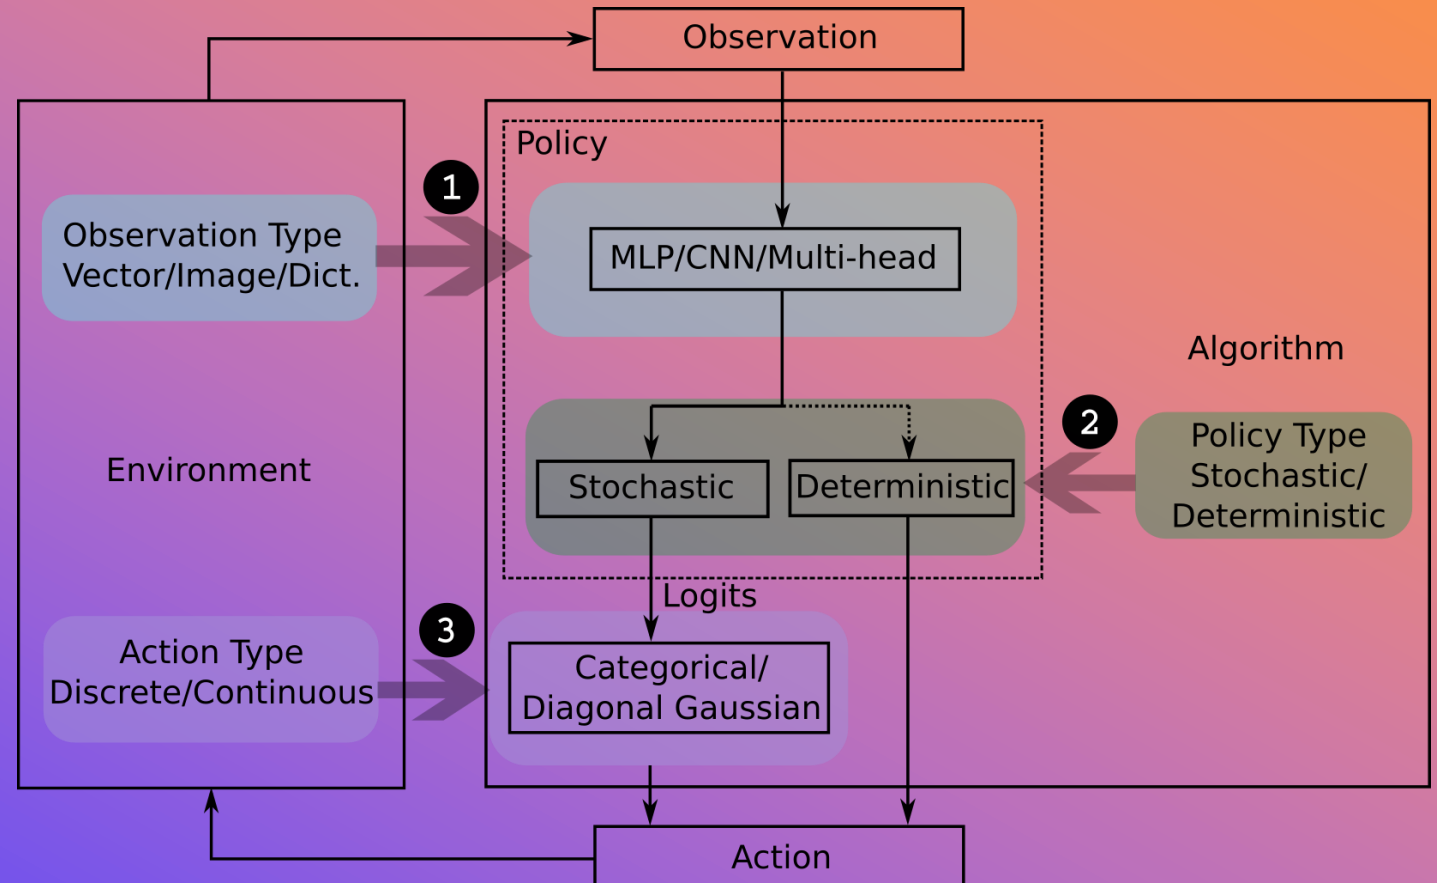

### 3. DRL Model Zoo

Implemented DRL algorithms in RLzoo (more than 10 types):

DQN, double DQN, dueling DQN, noisy DQN, distributed DQN;  
Hindsight experience replay (HER), DDPG, TD3, SAC, A2C, A3C, PPO, DPPO, TRPO, etc.

+

•

Comparison against other libraries: (in terms of alg., env. supports and script brevity )

○

| Library     | # Algo. | # Env. | Image | Vector | Dict. | LoC   |
|-------------|---------|--------|-------|--------|-------|-------|
| RLzoo       | 12      | 7      | ✓     | ✓      | ✓     | 4     |
| Baselines   | 9       | 5      | ✓     | ✓      | ✓     | N/A   |
| Tianshou    | 8       | 5      | ✓     | ✓      | ✓     | 15-20 |
| Coach       | 11      | 8      | ✓     | ✓      | ✗     | N/A   |
| ReAgent     | 4       | 3      | ✓     | ✓      | ✗     | 5     |
| garage      | 9       | 6      | ✓     | ✓      | ✗     | 5-10  |
| keras-rl    | 3       | 5      | ✓     | ✓      | ✓     | 10-15 |
| MushroomRL  | 9       | 7      | ✓     | ✓      | ✗     | 5-10  |
| Tensorforce | 8       | 5      | ✓     | ✓      | ✓     | 5-15  |

RLzoo is rich but simple!

## Additional: Distributed Training Framework

- + • RLzoo also provides a distributed training framework<sup>1</sup> for training across multiple GPUs and machines, based on KungFu<sup>2</sup>.
- 

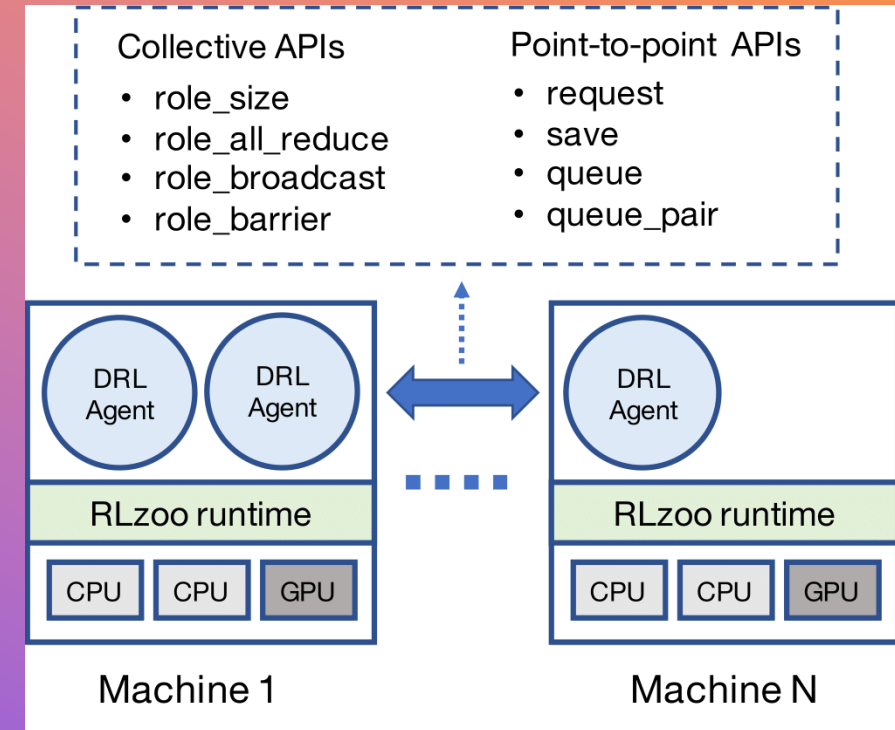

1. More details see the branch: [https://github.com/tensorlayer/RLzoo/tree/distributed\\_rlzoo](https://github.com/tensorlayer/RLzoo/tree/distributed_rlzoo)

2. KungFu: <https://github.com/llds/KungFu>

# Community

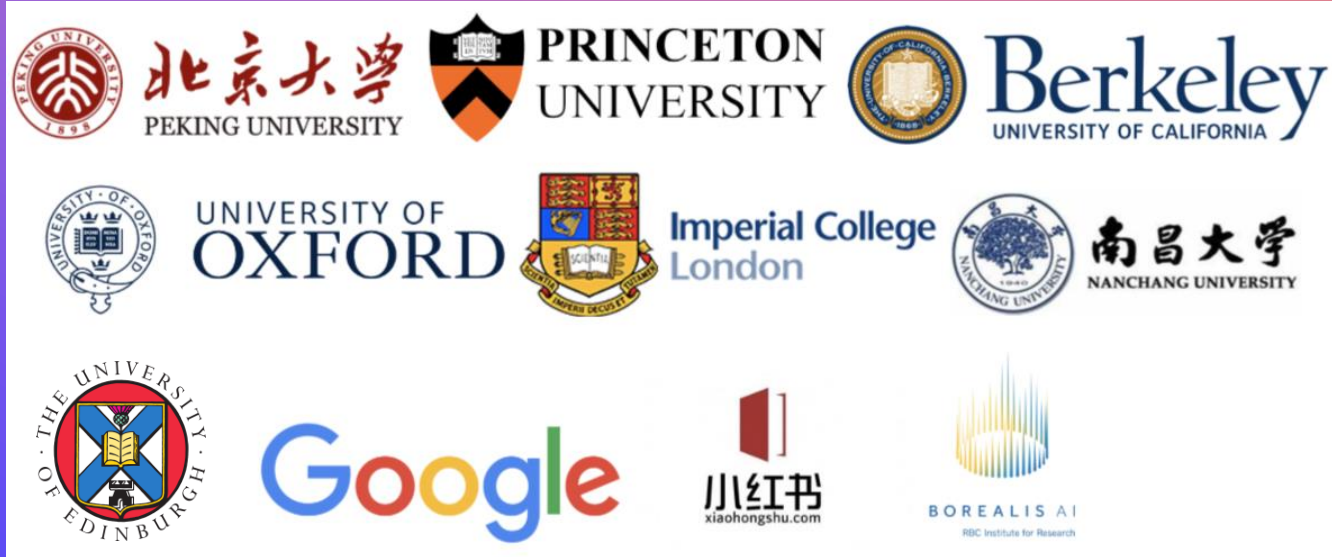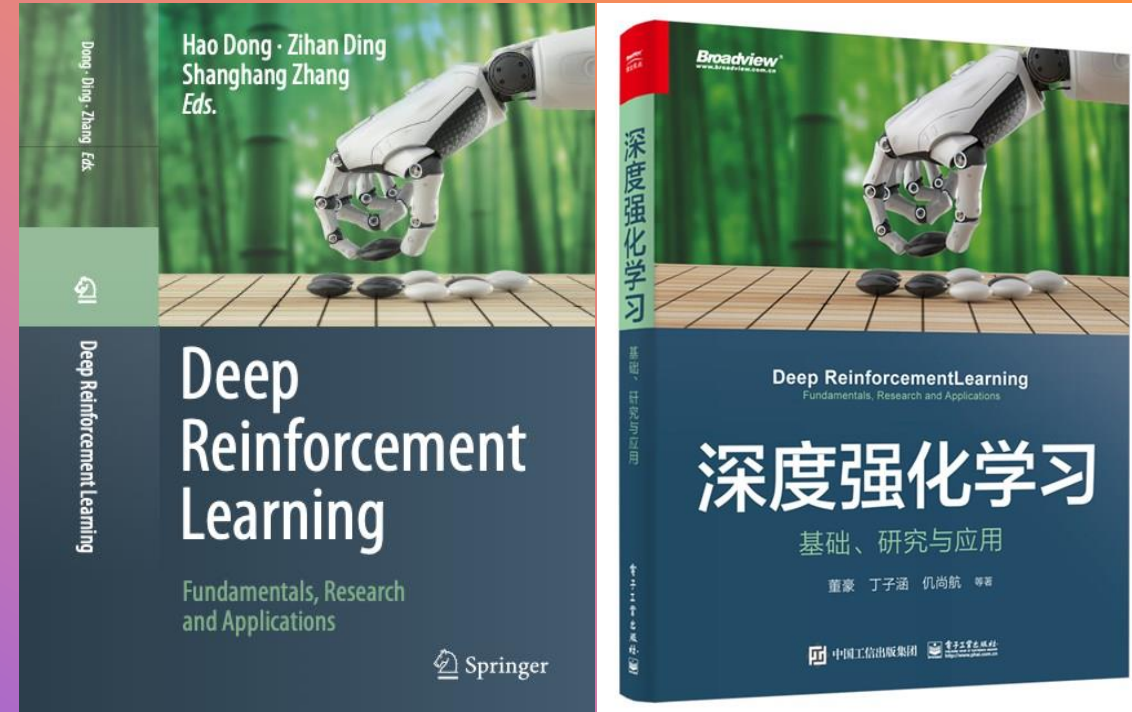

RLzoo is jointly contributed by people from a variety of institutes.

Based on RLzoo community, there is a featured book ***Deep Reinforcement Learning: Fundamentals, Research and Applications*** published by Springer 2020 in English and Publishing House of Electronics Industry in Chinese.

# THANKS

Thanks for the support of TensorLayer community.  
Look forward to your contribution to RLzoo community!

Contact: [zhding@mail.ustc.edu.cn](mailto:zhding@mail.ustc.edu.cn)
